1     **NextSV: a meta-caller for structural variants from low-coverage**  
2                                   **long-read sequencing data**

3  
4  
5  
6  
7  
8  
9

**Li Fang<sup>1,2,3</sup>, Jiang Hu<sup>1</sup>, Depeng Wang<sup>1</sup>, Kai Wang<sup>2,3,4,\*</sup>**

10    1: Grandomics Biosciences, Beijing 102206, China

11    2: Raymond G. Perelman Center for Cellular and Molecular Therapeutics, Children’s Hospital of  
12    Philadelphia, Philadelphia, PA 19104, USA

13    3: Department of Pathology and Laboratory Medicine, University of Pennsylvania Perelman  
14    School of Medicine, Philadelphia, PA 19104, USA

15    4: Previous address: Department of Biomedical Informatics and Institute for Genomic Medicine,  
16    Columbia University Medical Center, New York, NY 10032, USA

17

18    \*Please address correspondence to: [wangk@email.chop.edu](mailto:wangk@email.chop.edu)

19

20

## 21 **Abstract**

22 **Background:** Structural variants (SVs) in human genomes are implicated in a variety of human  
23 diseases. Long-read sequencing delivers much longer read lengths than short-read sequencing and  
24 may greatly improve SV detection. However, due to the relatively high cost of long-read  
25 sequencing, it is unclear what coverage is needed and how to optimally use the aligners and SV  
26 callers.

27 **Results:** In this study, we developed NextSV, a meta-caller to perform SV calling from low  
28 coverage long-read sequencing data. NextSV integrates three aligners and three SV callers and  
29 generates two integrated call sets (sensitive/stringent) for different analysis purposes. We  
30 evaluated SV calling performance of NextSV under different PacBio coverages on two personal  
31 genomes, NA12878 and HX1. Our results showed that, compared with running any single SV  
32 caller, NextSV stringent call set had higher precision and balanced accuracy (F1 score) while  
33 NextSV sensitive call set had a higher recall. At 10X coverage, the recall of NextSV sensitive call  
34 set was 93.5% to 94.1% for deletions and 87.9% to 93.2% for insertions, indicating that ~10X  
35 coverage might be an optimal coverage to use in practice, considering the balance between the  
36 sequencing costs and the recall rates. We further evaluated the Mendelian errors on an Ashkenazi  
37 Jewish trio dataset.

38 **Conclusions:** Our results provide useful guidelines for SV detection from low coverage whole-  
39 genome PacBio data and we expect that NextSV will facilitate the analysis of SVs on long-read  
40 sequencing data.

41

## 42 **Keywords**

43 long-read sequencing, structural variants, low coverage, PacBio

## 44 **Background**

45 Structural variants (SVs) represent genomic rearrangements (typically defined as longer than 50  
46 bp), and SVs may play important roles in human diversity and disease susceptibility [1-3]. Many  
47 inherited diseases and cancers have been associated with a large number of SVs in recent years [4-  
48 9]. Recent advances in next-generation sequencing (NGS) technologies have facilitated the  
49 analysis of variations such as SNPs and small indels in unprecedented details, but the discovery of  
50 SVs using short-read sequencing still remains challenging [10]. Single-molecule, real-time (SMRT)  
51 sequencing developed by Pacific Biosciences (PacBio) produces long-read sequencing data,  
52 making it potentially well-suited for SV detection in personal genomes [10, 11]. Most recently,  
53 Merker et al. reported the application of low coverage whole genome PacBio sequencing to  
54 identify pathogenic structural variants from a patient with autosomal dominant Carney complex,  
55 for whom targeted clinical gene testing and whole genome short-read sequencing were both  
56 negative [12]. This represents a clear example that long-read sequencing may solve some negative  
57 cases in clinical diagnostic settings.

58  
59 Two popular SV software tools have been developed specifically for long-read sequencing:  
60 PBHoney [13] and Sniffles [14]. PBHoney identifies genomic variants via two algorithms, long-  
61 read discordance (PBHoney-Spots) and interrupted mapping (PBHoney-Tails). Sniffles is a SV  
62 caller written in C++ and it detects SVs using evidence from split-read alignments, high-mismatch  
63 regions, and coverage analysis [14]. PBHoney uses BAM files generated by BLASR [15] as input  
64 while Sniffles requires BAM files from BWA-MEM [16] or NGMLR [14], a new long-read aligner.  
65 Due to the relatively high cost of PacBio sequencing, users are often faced with issues such as  
66 what coverage is needed and how to get the best use of the available aligners and SV callers. In

67 addition, it is unclear which software tool performs the best in low-coverage settings, and whether  
68 the combination of software tools can improve performance of SV calls. Finally, the execution of  
69 these software tools is often not straightforward and requires careful re-parameterization given  
70 specific coverage of the source data.

71  
72 To address these challenges, we developed NextSV, an automated SV detection pipeline  
73 integrating multiple tools. NextSV automatically execute these software tools with optimized  
74 parameters for user-specified coverage, then integrates results of each caller and generates a  
75 sensitive call set and a stringent call set, for different analysis purposes.

76  
77 Recently, the Genome in a Bottle (GIAB) consortium and the 1000 Genome Project Consortium  
78 released high-confidence SV calls for the NA12878 genome, an extensively sequenced genome  
79 by different platforms, enabling benchmarking of SV callers [17, 18]. They also published  
80 sequencing data of seven human genomes, including PacBio data of an Ashkenazi Jewish (AJ)  
81 family trio [19]. Previously, we sequenced a Chinese individual HX1 on the PacBio platform with  
82 over 100X coverage, and generated assembly-based SV call sets [20]. Using data sets of NA12878,  
83 HX1 and the AJ family trio, we evaluated the performance of four aligner/SV caller combinations  
84 (BLASR / PBHoney-Spots, BLASR / PBHoney-Tails, BWA / Sniffles and NGMLR / Sniffles) as  
85 well as NextSV under different PacBio coverages. We expect that NextSV will facilitate the  
86 detection and analysis of SVs on long-read sequencing data.

87

## 88 **Materials and Methods**

### 89 **PacBio data sets used for this study**

90 Five whole-genome PacBio sequencing data sets were used to test the performance of SV calling  
91 pipelines (Table 1). Data sets of NA12878 and HX1 genome were downloaded from NCBI SRA  
92 database (Accession: SRX627421, SRX1424851). Data sets of the AJ family trio were  
93 downloaded from the FTP site of National Institute of Standards and Technology (NIST) [21].  
94 After we obtained raw data, we extracted subreads (reads that can be used for analysis) using the  
95 SMRT Portal software (Pacific Biosciences, Menlo Park, CA) with filtering parameters  
96 (minReadScore=0.75, minLength=500). The subreads were mapped to the reference genome using  
97 BLASR [15], BWA-MEM [16] or NGMLR [14]. The BAM files were down-sampled to different  
98 coverages using SAMtools (samtools view -s). We performed five subsampling replicates at each  
99 coverage. The down-sampled coverages and mean read lengths of the data sets were shown in  
100 Table 1.

101

### 102 **SV detection using BLASR / PBHoney-Spots and BLASR / PBHoney-Tails**

103 PacBio subreads were iteratively aligned to the human reference genome (GRCh38 for HX1,  
104 GRCh37 for NA12878 and AJ trio genomes, depending on the reference of high-confidence set)  
105 using the BLASR aligner (parameter: -bestn 1). Each read's single best alignment was stored in  
106 the SAM output. Unmapped portions of each read were extracted from the alignments and  
107 remapped to the reference genome. The alignments in SAM format were converted to BAM format  
108 and sorted by SAMtools. PBHoney-Tails and PBHoney-Spots (from PBSuite-15.8.24) were run  
109 with slightly modified parameters (minimal read support 2, instead of 3 and consensus polishing  
110 disabled) to increase sensitivity and to discover SVs under low coverages (2-15X). The reference  
111 FASTA files used in this study were downloaded from the FTP sites of 1000 Genome Project [22]  
112 (GRCh37) and NCBI [23] (GRCh38). The FASTA files contain assembled chromosomes with  
113 unlocalized, unplaced and decoy sequences.

114

### 115 **SV detection using BWA / Sniffles and NGMLR / Sniffles**

116 PacBio subreads were aligned to the reference genome, using BWA-MEM (bwa mem -M -x pacbio)  
117 or NGMLR (default parameters) to generate the BAM file. The BAM file was sorted by SAMtools,  
118 then used as input of Sniffles (version 1.0.5). Sniffles was run with slightly modified parameters  
119 (minimal read support 2, instead of 10) to increase sensitivity and discover SVs under low fold of  
120 coverages (2-15X).

121

### 122 **NextSV analysis pipeline**

123 As shown in Figure 1, NextSV currently supports four aligner / SV caller combinations: BLASR  
124 / PBHoney-Spots, BLASR / PBHoney-Tails, BWA / Sniffles and NGMLR / Sniffles. NextSV  
125 extracts FASTQ files from PacBio raw data (.hdf5 or .bam) and performs QC according to users  
126 specified settings. Once the aligner / SV caller combination is selected by user, NextSV  
127 automatically generates the scripts for alignment, sorting, and SV calling with appropriate  
128 parameters. When the analysis is finished, NextSV will format the raw result files (.tails, .spots,  
129 or .vcf files) into BED files. If multiple aligner/SV caller combinations are selected, NextSV will  
130 integrate the calls to generate a sensitive (by union) and a stringent (by intersection) call set. The  
131 output of NextSV is ANNOVAR-compatible, so that users can easily perform downstream  
132 annotation using ANNOVAR [24]. In addition, NextSV also supports job submitting via Sun Grid  
133 Engine (SGE), a popular batch-queuing system in cluster environment.

134

135 Users can choose to run any of the four aligner/SV caller combination. By default, NextSV will  
136 enable BLASR / PBHoney-Spots, BLASR / PBHoney-Tails and NGMLR / Sniffles and integrate

137 the results to generate the sensitive calls and stringent calls. We do not enable BWA / Sniffles by  
138 default because Sniffles works better with NGMLR in our evaluation and alignment is a time  
139 consuming step. SVs that are shorter than reads may result in intra-read discordances while larger  
140 SVs may result in soft-clipped tails of long reads. We suggest running both PBHoney-Spots and  
141 PBHoney-Tails because they are two complementary algorithms designed to detect intra-read  
142 discordances and soft-clipped tails, respectively. Sniffles uses multiple evidences to detect SV so  
143 it should be suitable for both types of SVs.

144

145 NextSV sensitive call set is generated as:

146 
$$\text{SNIF} \cup (\text{SPOT} \cup \text{TAIL}),$$

147 and NextSV stringent call set is generated as:

148 
$$\text{SNIF} \cap (\text{SPOT} \cup \text{TAIL}),$$

149 where SNIF denotes the call set of Sniffles (the aligner can be BWA or NGMLR, whichever is  
150 enabled; if both aligners are enabled, the call set of NGMLR/Sniffles will be used) , SPOT denotes  
151 the call set of BLASR / PBHoney-Spots and TAIL denotes the call set of BLASR / PBHoney-  
152 Tails.

153

#### 154 **Comparing two SV call sets**

155 The criteria for merging two SV calls were chosen to follow what was done by the NIST/GIAB  
156 analysis team [25] and a previous study [26]. Two deletion calls were considered the same if they  
157 had at least 50% reciprocal overlap (the overlapped region was more than 50% of both calls). The  
158 insertion call had a single breakpoint position so the criterion for insertion calls should be different  
159 from that of deletion calls. Two insertion calls were considered the same if the two breakpoints

160 were within a distance *delta*. *Delta* used by NIST/GIAB analysis team was 1000 bp and used by  
161 Pendleton et al (reference [26]) was 100 bp. However, 100 bp was too small for our analysis since  
162 the coverages (2-15X) were far lower than that of Pendleton's data set (46X in total). On the other  
163 hand, 1000 bp might be too large to include distant calls as the same merged call. Therefore, we  
164 chose 500 bp as a compromise. When merging two SVs, the average start and end positions were  
165 taken.

166

### 167 **High-confidence SV call sets**

168 The high-confidence deletion call set of the NA12878 genome was release by the Genome In A  
169 Bottle (GIAB) consortium [17], in which most of the calls were refined by experimental validation  
170 or other independent technologies. The high-confidence insertion call set of the NA12878 genome  
171 was obtained by merging the high-confidence insertion calls of 1000 Genome phase 3 [18] and  
172 high-confidence insertion calls from GIAB. For the HX1 genome, we generated the high-  
173 confidence SV call set via two steps. First, we used the SV calls from a previously validated local  
174 assembly-based approach [11] as the initial high-quality calls. Next, we detected SVs on 103X  
175 coverage PacBio data set of the HX1 genome using BLASR / PBHoney-Spots, BLASR /  
176 PBHoney-Tails, BWA / Sniffles and NGMLR / Sniffles (minimal read support=20 for each SV  
177 caller). The initial high-quality calls (from step 1) that overlapped with one of the four 103X call  
178 sets (from step 2) were retained as final high-confidence calls. SVs are generally defined as  
179 genomic rearrangements that are larger than 50 bp. However, we do not consider SVs that are less  
180 than 200 bp. There are two reasons. First, SVs that are smaller than 200 bp are within the library  
181 size of paired-end short-read sequencing. Therefore, they may be readily detected by short-read  
182 sequencing. Second, PacBio sequencing has a fairly high per-base error rate and we found it has a



183 very low precision on detection of small SVs from coverage data sets. Therefore, we believe that  
184 the advantage of PacBio sequencing may be the detection of large SVs that are more than 200 bp.  
185 The number of SVs in the high-confidence sets is shown in Table 2.

186

187

## 188 **Performance Evaluation of SV callers**

189 The SV calls of each caller were compared with the high-confidence SV set. Precision, recall, and  
190 F1 score were used to evaluate the performance of the callers. Precision, recall, and F1 were  
191 calculated as

$$192 \quad \text{Precision} = \frac{TP}{TP+FP},$$

$$193 \quad \text{Recall} = \frac{TP}{TP+FN},$$

$$194 \quad \text{F1} = 2 \cdot \frac{\text{precision} \cdot \text{recall}}{\text{precision} + \text{recall}}$$

195 where TP is the number of true positives (variants called by a variant caller and matching the high-  
196 confidence set), FP is the number of false positives (variants called by a variant caller but not in  
197 the high-confidence set), and FN is the number of false negatives (variants in the high-confidence  
198 set but not called by a variant caller).

199

200

201

## 202 **Results**

### 203 **Performance of SV calling on different coverages of the NA12878 genome**

204 To determine the optimal coverage for SV detection on PacBio data, we evaluated the performance  
205 of NextSV under several different coverages. We downloaded a recently published PacBio data

206 set of NA12878 [26] and down-sampled the data set to 2X, 4X, 6X, 8X, 10X, 12X, and 15X. SV  
207 calling was performed using NextSV under each coverage. We performed five subsampling  
208 replicates for each coverage so that the down-sampling errors could be estimated. All supported  
209 aligner/SV caller combinations were evaluated. At least two supporting reads was required for all  
210 SV calls. The resulting calls were compared with the high-confidence SV set (including 2094  
211 deletion calls and 1114 insertion calls) described in the Method section.

212  
213 First, we examined how many calls in the high-confidence set can be discovered. As shown in  
214 Figure 2, the recall increased rapidly before 10X coverage but the slope of increase slowed down  
215 after 10X. The standard deviations of recall values of the down-sampling replicates were very  
216 small (shown as error bars in the Figure). Among the four aligner / SV caller combinations,  
217 BLASR / PBHoney-Spots had the highest recall for insertions while NGMLR / Sniffles had the  
218 highest recall for deletions. At 10X coverage, BLASR / PBHoney-Spots had an average recall of  
219 76.2% for deletions and an average recall of 81.5% for insertions; NGMLR / Sniffles had an  
220 average recall of 91.1% for deletions and an average recall of 76.3% for insertions. BWA / Sniffles  
221 had a lower recall for deletions (72.6%) and insertions (50.8%) than NGMLR / Sniffles, indicating  
222 that NGMLR was a better aligner for Sniffles. PBHoney-Tails only detected 26.3% deletions and  
223 0.1% insertions. NextSV sensitive call set, which was generated by the union call set of BLASR /  
224 PBHoney-Spots, BLASR / PBHoney-Tails, and NGMLR / Sniffles, had the highest recall. At 10X  
225 coverage, the average recall of NextSV sensitive call set is 94.7% for deletions and 87.8% for  
226 insertions. At 15X coverage, the recall of NextSV sensitive call set increased slightly. Therefore,  
227 10X coverage might be an optimal coverage to use in practice, considering the relatively high  
228 sequencing costs and the generally high recall rates.

229  
230 Second, we examined the precision and balanced accuracy (F1 scores) under different coverages  
231 (Figure 3). The precision was calculated as the fraction of detected SVs which matching the high-  
232 confidence set. For deletions calls, NextSV stringent call set had the second highest precision and  
233 highest F1 score. For insertion calls, NextSV stringent call set had the highest precision and F1  
234 score at each coverage. Therefore, NextSV stringent call set performs the best, considering the  
235 balance between recall and precision. We observed that the precision decreased as the coverage  
236 increased from 2X to 15X. This was because we used the same parameter (at least two supporting  
237 reads) to generate the calls for each coverage. Therefore, the false positive rates increased as the  
238 coverage increased. A stricter parameter (e.g. at least three supporting reads) for 10X and 15X  
239 coverages may increase the precision, but decrease the recall. We discussed the trade-off between  
240 recall and precision in the Discussion section. Detailed values of recall rates, precisions and F1  
241 scores on different coverages of the NA12878 genome were shown in Table S1-S12.

242  
243 **Performance of SV calling on different coverages on the HX1 genome**

244 To verify the performance of SV detection on different individuals, we also performed evaluation  
245 on a Chinese genome HX1, which was sequenced by us recently [20] at 103X PacBio coverage.  
246 The genome was sequenced using a newer version of chemical reagents and thus the mean read  
247 length of HX1 was 40% longer than that of NA12878 (Table 1). The total data set was down-  
248 sampled to three representative coverages (6X, 10X and 15X). We also performed five  
249 subsampling replicates at each coverage. SVs were called using the four pipelines described above  
250 and compared to the high-confidence set. The results were similar to those of the NA12878 data  
251 set (Figure 4). At 10X coverage, NextSV sensitive call set had an average recall of 95.5% for

252 deletions and 90.3% for insertions, highest among all the call sets. NextSV stringent call set had  
253 the highest precisions and F1 scores. Among the four aligner / SV caller combinations, NGMLR /  
254 Sniffles discovered the most deletions (91.6%) and BLASR / PBHoney-Spots discovered the most  
255 insertions (81.5%) at 10X coverage. BWA / Sniffles had a higher precision but a lower recall and  
256 F1 score than NGMLR / Sniffles. Detailed values of recall rates, precisions and F1 scores on  
257 different coverages of the HX1 genome were shown in Table S13-S24.

258

### 259 **Evaluation on Mendelian Errors**

260 As the *de novo* mutation rate is very low [27, 28], Mendelian errors are more likely a result of  
261 genotyping errors and can be used as a quality control criteria in genome sequencing [29]. Due to  
262 the lack of gold standard call sets, here we evaluated the errors of allele drop-in (ADI), which  
263 means the presence of an allele in offspring that does not appear in either parent. The ADI rate is  
264 calculated as the ratio of ADI events to SV calls detected in the offspring. We used a whole genome  
265 PacBio sequencing data set of an AJ family trio released by NIST [19] to do the evaluation. The  
266 sequencing data for father, mother and son are 32X, 29X, and 63X, respectively. First, we did the  
267 ADI rate analysis using all the available data. Since the coverages were high, 8 supporting reads  
268 were required for SV calls of the parents and 15 supporting reads were required for SV calls of the  
269 son. Among the four aligner/SV caller combinations, NGMLR/Sniffles had the lowest ADI rate  
270 (12.0%) for deletions, while BLASR/PBHoney-Tails had the lowest ADI rate (10%) for insertions  
271 (Figure 5). Next, we down-sampled the sequencing data of the son to 10X coverage and analyzed  
272 the ADI rate at this low coverage. Five down-sampling replicates were performed. The ADI rates  
273 at 10X coverage were generally higher than those at 63X coverage. NGMLR/Sniffles achieved  
274 lowest ADI rate for both deletions (19.0%) and insertions (25.2%) among the four aligner/SV

275 caller combinations. NextSV stringent call set had the lowest ADI rate for insertions (15.7%) and  
276 second lowest ADI rate for deletions (20.0%). The standard deviations of ADI rates of the down-  
277 sampling replicates were very small (shown as error bars in the Figure).

278

## 279 **Computational Performance of NextSV**

280 To evaluate the computational resources consumed by NextSV, we used the whole genome  
281 sequencing data set of HX1 (10X coverage) for benchmarking. All aligners and SV callers in  
282 NextSV were tested using a machine equipped with 12-core Intel Xeon 2.66 GHz CPU and 48  
283 Gigabytes of memory. As shown in Table 3, mapping is the most time-consuming step. BLASR  
284 takes about 80 hours to map the reads, whereas NGMLR needs only 11.2 hours. The SV calling  
285 step is much faster. PBHoney-Spots and Sniffles take about 1 hour, while PBHoney-Tails needs  
286 0.27 hour. In total, the BLASR / PBHoney combination takes 80.8 hours while the NGMLR /  
287 Sniffles combination takes 12.5 hours, 84.5% less than the former one. Since BLASR/PBHoney-  
288 Spots and NGMLR / Sniffles have good performance on SV calling and running PBHoney-Tails  
289 is very fast given the BLASR output, the NextSV pipeline will execute the three methods by  
290 default for generating the final results.

291

## 292 **Discussion**

293 Long-read sequencing such as PacBio sequencing has clear advantages over short-read sequencing  
294 on SV discovery [10]. However, its application in real-world setting is often limited due to the  
295 relatively high sequencing cost and hence the relatively low sequencing coverage. Some efforts  
296 have been made to improve SV detection from low coverage short-read data[30], but methods for  
297 improving SV detection from long-read sequencing data have not been reported. In this study, we

298 developed NextSV, a meta SV caller integrating multiple aligners and SV callers to improve SV  
299 discovery on low-coverage PacBio data sets. Our results showed that, NextSV stringent call set  
300 had the highest precisions and F1 scores while NextSV sensitive call set had the highest recall. At  
301 10X coverage, the recall of NextSV sensitive call set was 94.7% to 95.5% for deletions and 87.8%  
302 to 90.3% for insertions. At 15X coverage, there was only a slight increase in recall. Therefore,  
303 ~10X coverage can be an optimal coverage to use in practice, considering the balance between the  
304 sequencing costs and the recall rates.

305  
306 The high-confidence call set of HX1 genome was generated using two steps. First, we used a call  
307 set from a previously validated local assembly-based approach [11, 20, 31] as the initial high-  
308 quality calls. Second, we detected SVs on 103X coverage PacBio data set of the HX1 genome  
309 using the four aligner/SV caller combinations described above. The calls were filtered using a  
310 strict parameter (minimal read support=20 for each SV caller). The initial high-quality calls that  
311 overlapped with one of the four 103X call sets were retained as final high-confidence calls. Since  
312 the aligners/SV callers contribute to generation of the high-confidence call sets, there may be some  
313 biases on the comparison of aligner/SV callers. However, it would be less biased on comparison  
314 of the performances on different coverages, which is an important goal of our study.

315  
316 There is often a trade-off between recall and precision. NextSV generates a sensitive call set and  
317 a stringent call set, for different purposes. NextSV sensitive call set is suitable for users who  
318 consider recall more important than precision and who can afford extensive downstream analysis  
319 (such as Sanger sequencing) to validate the candidate variants. This is often the case when doing  
320 disease-casual variant discovery on personal genomes. NextSV stringent call set has the highest

321 precision, F1 score. It is suitable for users who aim to perform genome-wide analysis of SVs on a  
322 collection of samples, with limited downstream validation.

323  
324 The performance of SV callers are affected by the parameter settings. The number of supporting  
325 reads is a key parameter that affect the trade-off between recall and precision. By default, PBHoney  
326 requires a minimal read support of 3 for an SV event and Sniffles requires a minimal read support  
327 of 10 for an SV event. However, this may be too high for low coverage data set. In our evaluation  
328 of recall and precision, we changed this setting to require a minimal read support of 2. This allows  
329 detection of SVs from very low coverage regions, with an acceptable precision. Thus, substantially  
330 higher number of true positives would be detected and less variants of interest would be missed.  
331 For users who consider precision to be more important than recall, they can either use the NextSV  
332 stringent call set or specify a stricter parameter (e.g. requiring more supporting reads) when  
333 running the NextSV pipeline. The F1 score is a balance between recall and precision. Therefore,  
334 its correlation with coverage is affected by the two aspects. In general, as the coverage increases,  
335 the recall increases but the precision decreases. Therefore, the F1 score may either increase or  
336 decrease as the coverage increases.

337  
338 In addition to test recalls and precisions, we examined the allele drop-in (ADI) errors, which  
339 represent the SV calls that in the offspring but not appear in either parent. Since the *de novo*  
340 mutation rate is very low, the ADI errors may mainly come from errors of sequencing and  
341 subsequent SV detection. In our results, the ADI rates of insertions are higher than those of deletion  
342 calls, which is consistent with the fact that PacBio sequencing has higher per-base insertion errors  
343 than deletion errors. Another source of ADI may come from the SV callers. SV detection from

344 PacBio data set is still in its early stage. The currently available SV callers are not carefully  
345 designed for low-coverage data sets. For example, Sniffles requires 10 reads to support a SV under  
346 default settings, which means at least 20X coverage is required to detect a heterozygous SV. We  
347 expect the improvement of SV callers in the future.

348  
349 NextSV currently supports four aligner / SV caller combinations: BLASR / PBHoney-Spots,  
350 BLASR / PBHoney-Tails, BWA / Sniffles, NGMLR / Sniffles, but we expect to continuously  
351 expand the support for other aligner / caller combinations. In the future, if more aligners/SV callers  
352 are supported, we will evaluate the performance of each combination and find the best aligner for  
353 each SV caller. The NextSV sensitive call will be the union call set of all SV callers; the NextSV  
354 stringent calls will be the calls that are detected by at least two SV callers. If one SV caller can  
355 work with multiple aligners, only the call set of its best aligner will be used.

356  
357 In this study, we only evaluated the performance for insertions and deletions because we only have  
358 the high-confidence calls of insertions and deletions. This is another limitation of the study. We  
359 will evaluate the performance on other types of SVs in the future when more high-confidence SV  
360 calls are available. Nonetheless, NextSV generates SV calls of all types. The output of NextSV is  
361 in ANNOVAR-compatible format. Users can easily perform downstream annotation using  
362 ANNOVAR and disease gene discovery using Phenolyzer [32]. NextSV is available on GitHub  
363 [33] and can be installed by one simple command.

364

## 365 **Conclusion**



366 In this study, we proposed NextSV, a comprehensive, user-friendly and efficient meta-caller to  
367 perform SV calling from low coverage long-read sequencing data. NextSV integrates multiple  
368 aligners and SV callers and performs better than running a single SV caller. We also showed that  
369 ~10X PacBio coverage can be an optimal coverage to use in practice, considering the balance  
370 between the sequencing costs and the recall rates. Our results provide useful guidelines for SV  
371 detection from low coverage whole-genome PacBio data and we expect that NextSV will facilitate  
372 the analysis of SVs on long-read sequencing data.

373

## 374 **Abbreviations**

375 SV: structural variant; NGS: next-generation sequencing; SMRT: single-molecule, real-time;  
376 GIAB: Genome in a Bottle; NIST: National Institute of Standards and Technology; AJ: Ashkenazi  
377 Jewish; ADI: allele drop-in

378

379

## 380 **Declarations**

### 381 **Competing Interests**

382 LF, JH and DW are former or current employees and KW is a consultant for Grandomics  
383 Biosciences.

384

### 385 **Author's Contributions**

386 LF performed the evaluation, implemented the software and wrote the manuscript. JH and DW  
387 tested the software and advised on the study. DW and KW conceived and supervised the study,  
388 and revised the manuscript. All authors read and approved the final manuscript.

389

390 **Acknowledgments**

391 The authors wish to thank the National Institute of Standards and Technology and Genome in a  
392 Bottle Consortium for making the reference data on PacBio sequencing available to benchmark  
393 bioinformatics software tools. We also thank members of Grandomics to test the software tools  
394 and offering valuable feedback.

395

396 **Funding**

397 Not applicable.

398

399 **Availability of Data and Materials**

400 The PacBio sequencing data of NA12878 and HX1 analyzed in this study are available in the  
401 NCBI SRA database (Accession: SRX627421, SRX1424851). The PacBio sequencing data of  
402 AJ trio family is available at the FTP site of NIST ([ftp://ftp-  
403 trace.ncbi.nlm.nih.gov/giab/ftp/data/AshkenazimTrio/](ftp://ftp-trace.ncbi.nlm.nih.gov/giab/ftp/data/AshkenazimTrio/), release date: Nov 9<sup>th</sup>, 2015). NextSV is  
404 available at <http://github.com/Nextomics/NextSV>.

405

406 **Ethics approval and consent to participate**

407 Not applicable.

408

409 **Consent for publication**

410 Not applicable.

411

412

## 413 References

- 414 1. Feuk L, Carson AR, Scherer SW. Structural variation in the human genome. *Nat Rev Genet*  
415 2006, 7(2):85-97.
- 416 2. Pang AW, MacDonald JR, Pinto D, Wei J, Rafiq MA, Conrad DF, Park H, Hurles ME, Lee C,  
417 Venter JC, Kirkness EF, Levy S, Feuk L, Scherer SW. Towards a comprehensive structural variation map  
418 of an individual human genome. *Genome Biol* 2010, 11(5):R52.
- 419 3. Tattini L, D'Aurizio R, Magi A. Detection of Genomic Structural Variants from Next-Generation  
420 Sequencing Data. *Front Bioeng Biotechnol* 2015, 3:92.
- 421 4. Stankiewicz P, Lupski JR. Structural variation in the human genome and its role in disease. *Annu*  
422 *Rev Med* 2010, 61:437-455.
- 423 5. Weischenfeldt J, Symmons O, Spitz F, Korbel JO. Phenotypic impact of genomic structural  
424 variation: insights from and for human disease. *Nat Rev Genet* 2013, 14(2):125-138.
- 425 6. Yang L, Luquette LJ, Gehlenborg N, Xi R, Haseley PS, Hsieh CH, Zhang C, Ren X, Protopopov  
426 A, Chin L, Kucherlapati R, Lee C, Park PJ. Diverse mechanisms of somatic structural variations in human  
427 cancer genomes. *Cell* 2013, 153(4):919-929.
- 428 7. Moncunill V, Gonzalez S, Bea S, Andrieux LO, Salaverria I, Royo C, Martinez L, Puiggros M,  
429 Segura-Wang M, Stutz AM, Navarro A, Royo R, Gelpi JL, Gut IG, Lopez-Otin C, Orozco M, Korbel JO,  
430 Campo E, Puente XS, Torrents D. Comprehensive characterization of complex structural variations in  
431 cancer by directly comparing genome sequence reads. *Nat Biotechnol* 2014, 32(11):1106-1112.
- 432 8. Zhang F, Gu W, Hurles ME, Lupski JR. Copy number variation in human health, disease, and  
433 evolution. *Annu Rev Genomics Hum Genet* 2009, 10:451-481.
- 434 9. Carvalho CM, Lupski JR. Mechanisms underlying structural variant formation in genomic  
435 disorders. *Nat Rev Genet* 2016, 17(4):224-238.
- 436 10. English AC, Salerno WJ, Hampton OA, Gonzaga-Jauregui C, Ambreth S, Ritter DI, Beck CR,  
437 Davis CF, Dahdouli M, Ma S, Carroll A, Veeraraghavan N, Bruestle J, Drees B, Hastie A, Lam ET, White  
438 S, Mishra P, Wang M, Han Y, Zhang F, Stankiewicz P, Wheeler DA, Reid JG, Muzny DM, Rogers J, Sabo  
439 A, Worley KC, Lupski JR, Boerwinkle E, Gibbs RA. Assessing structural variation in a personal genome-  
440 towards a human reference diploid genome. *BMC Genomics* 2015, 16:286.
- 441 11. Chaisson MJ, Huddleston J, Dennis MY, Sudmant PH, Malig M, Hormozdiari F, Antonacci F, Surti  
442 U, Sandstrom R, Boitano M, Landolin JM, Stamatoyannopoulos JA, Hunkapiller MW, Korlach J, Eichler  
443 EE. Resolving the complexity of the human genome using single-molecule sequencing. *Nature* 2015,  
444 517(7536):608-611.
- 445 12. Merker J, Wenger AM, Sneddon T, Grove M, Waggott D, Utramerur S, Hou Y, Lambert CC, Eng  
446 KS, Hickey L, Korlach J, Ford J, Ashley EA. Long-read whole genome sequencing identifies causal  
447 structural variation in a Mendelian disease. *bioRxiv* 2016, doi:10.1101/090985.
- 448 13. English AC, Salerno WJ, Reid JG. PBHoney: identifying genomic variants via long-read  
449 discordance and interrupted mapping. *BMC Bioinformatics* 2014, 15:180.
- 450 14. Sedlazeck FJ, Rescheneder P, Smolka M, Fang H, Nattestad M, von Haeseler A, Schatz MC.  
451 Accurate detection of complex structural variations using single-molecule sequencing. *Nat Methods* 2018.
- 452 15. Chaisson MJ, Tesler G. Mapping single molecule sequencing reads using basic local alignment  
453 with successive refinement (BLASR): application and theory. *BMC Bioinformatics* 2012, 13(1):238.
- 454 16. Li H. Aligning sequence reads, clone sequences and assembly contigs with BWA-MEM. *arXiv*  
455 2013, 1303.3997v2 [q-bio.GN].
- 456 17. Parikh H, Mohiyuddin M, Lam HY, Iyer H, Chen D, Pratt M, Bartha G, Spies N, Losert W, Zook  
457 JM, Salit M. svclassify: a method to establish benchmark structural variant calls. *BMC Genomics* 2016,  
458 17:64.
- 459 18. Sudmant PH, Rausch T, Gardner EJ, Handsaker RE, Abyzov A, Huddleston J, Zhang Y, Ye K,  
460 Jun G, Hsi-Yang Fritz M, Konkil MK, Malhotra A, Stutz AM, Shi X, Paolo Casale F, Chen J, Hormozdiari  
461 F, Dayama G, Chen K, Malig M, Chaisson MJ, Walter K, Meiers S, Kashin S, Garrison E, Auton A, Lam  
462 HY, Jasmine Mu X, Alkan C, Antaki D, Bae T, Cerveira E, Chines P, Chong Z, Clarke L, Dal E, Ding L,  
463 Emery S, Fan X, Gujral M, Kahveci F, Kidd JM, Kong Y, Lameijer EW, McCarthy S, Flicek P, Gibbs RA,  
464 Marth G, Mason CE, Menelaou A, Muzny DM, Nelson BJ, Noor A, Parrish NF, Pendleton M, Quitadamo  
465 A, Raeder B, Schadt EE, Romanovitch M, Schlattl A, Sebra R, Shabalina AA, Untergasser A, Walker JA,  
466 Wang M, Yu F, Zhang C, Zhang J, Zheng-Bradley X, Zhou W, Zichner T, Sebat J, Batzer MA, McCarroll  
467 SA, Genomes Project C, Mills RE, Gerstein MB, Bashir A, Stegle O, Devine SE, Lee C, Eichler EE,

- 468 Korbelt JO. An integrated map of structural variation in 2,504 human genomes. *Nature* 2015,  
469 526(7571):75-81.
- 470 19. Zook JM, Catoe D, McDaniel J, Vang L, Spies N, Sidow A, Weng Z, Liu Y, Mason CE, Alexander  
471 N, Henaff E, McIntyre AB, Chandramohan D, Chen F, Jaeger E, Moshrefi A, Pham K, Stedman W, Liang  
472 T, Saghbini M, Dzakula Z, Hastie A, Cao H, Deikus G, Schadt E, Sebra R, Bashir A, Truty RM, Chang  
473 CC, Gulbahce N, Zhao K, Ghosh S, Hyland F, Fu Y, Chaisson M, Xiao C, Trow J, Sherry ST, Zaranek  
474 AW, Ball M, Bobe J, Estep P, Church GM, Marks P, Kyriazopoulou-Panagiotopoulou S, Zheng GX,  
475 Schnall-Levin M, Ordonez HS, Mudivarti PA, Giorda K, Sheng Y, Rypdal KB, Salit M. Extensive  
476 sequencing of seven human genomes to characterize benchmark reference materials. *Sci Data* 2016,  
477 3:160025.
- 478 20. Shi L, Guo Y, Dong C, Huddleston J, Yang H, Han X, Fu A, Li Q, Li N, Gong S, Lintner KE, Ding  
479 Q, Wang Z, Hu J, Wang D, Wang F, Wang L, Lyon GJ, Guan Y, Shen Y, Evgrafov OV, Knowles JA,  
480 Thibaud-Nissen F, Schneider V, Yu CY, Zhou L, Eichler EE, So KF, Wang K. Long-read sequencing and  
481 de novo assembly of a Chinese genome. *Nat Commun* 2016, 7:12065.
- 482 21. Zook JM. <ftp://ftp-trace.ncbi.nlm.nih.gov/giab/ftp/data/AshkenazimTrio/>. Accessed 1 Oct 2016.
- 483 22. 1000 Genomes Project.  
484 [ftp://ftp.1000genomes.ebi.ac.uk/vol1/ftp/technical/reference/phase2\\_reference\\_assembly\\_sequence/hs37](ftp://ftp.1000genomes.ebi.ac.uk/vol1/ftp/technical/reference/phase2_reference_assembly_sequence/hs37)  
485 <d5.fa.gz>. Accessed 20 Mar 2017.
- 486 23. NCBI.  
487 [ftp://ftp.ncbi.nlm.nih.gov/genomes/all/GCA/000/001/405/GCA\\_000001405.15\\_GRCh38/seqs\\_for\\_alignme](ftp://ftp.ncbi.nlm.nih.gov/genomes/all/GCA/000/001/405/GCA_000001405.15_GRCh38/seqs_for_alignme)  
488 [nt\\_pipelines.ucsc\\_ids/GCA\\_000001405.15\\_GRCh38\\_no\\_alt\\_plus\\_hs38d1\\_analysis\\_set.fna.gz](nt_pipelines.ucsc_ids/GCA_000001405.15_GRCh38_no_alt_plus_hs38d1_analysis_set.fna.gz).  
489 Accessed 20 Mar 2017.
- 490 24. Wang K, Li M, Hakonarson H. ANNOVAR: functional annotation of genetic variants from high-  
491 throughput sequencing data. *Nucleic Acids Res* 2010, 38(16):e164.
- 492 25. Zook JM. GIAB Analysis Team Breakout Summary. 2016.  
493 <https://www.slideshare.net/GenomeInABottle/giab-jan2016-analysis-team-breakout-summary>. Accessed 1  
494 Oct 2016.
- 495 26. Pendleton M, Sebra R, Pang AW, Ummat A, Franzen O, Rausch T, Stutz AM, Stedman W,  
496 Anantharaman T, Hastie A, Dai H, Fritz MH, Cao H, Cohain A, Deikus G, Durrett RE, Blanchard SC,  
497 Altman R, Chin CS, Guo Y, Paxinos EE, Korbelt JO, Darnell RB, McCombie WR, Kwok PY, Mason CE,  
498 Schadt EE, Bashir A. Assembly and diploid architecture of an individual human genome via single-  
499 molecule technologies. *Nat Methods* 2015, 12(8):780-786.
- 500 27. Kong A, Frigge ML, Masson G, Besenbacher S, Sulem P, Magnusson G, Gudjonsson SA,  
501 Sigurdsson A, Jonasdottir A, Jonasdottir A, Wong WS, Sigurdsson G, Walters GB, Steinberg S, Helgason  
502 H, Thorleifsson G, Gudbjartsson DF, Helgason A, Magnusson OT, Thorsteinsdottir U, Stefansson K. Rate  
503 of de novo mutations and the importance of father's age to disease risk. *Nature* 2012, 488(7412):471-475.
- 504 28. Veltman JA, Brunner HG. De novo mutations in human genetic disease. *Nat Rev Genet* 2012,  
505 13(8):565-575.
- 506 29. Pilipenko VV, He H, Kurowski BG, Alexander ES, Zhang X, Ding L, Mersha TB, Kottyan L, Fardo  
507 DW, Martin LJ. Using Mendelian inheritance errors as quality control criteria in whole genome sequencing  
508 data set. *BMC Proc* 2014, 8(Suppl 1 Genetic Analysis Workshop 18Vanessa Olmo):S21.
- 509 30. Zhang J, Wang J, Wu Y. An improved approach for accurate and efficient calling of structural  
510 variations with low-coverage sequence data. *BMC Bioinformatics* 2012, 13 Suppl 6:S6.
- 511 31. Huddleston J, Chaisson MJP, Steinberg KM, Warren W, Hoekzema K, Gordon D, Graves-  
512 Lindsay TA, Munson KM, Kronenberg ZN, Vives L, Peluso P, Boitano M, Chin CS, Korlach J, Wilson RK,  
513 Eichler EE. Discovery and genotyping of structural variation from long-read haploid genome sequence  
514 data. *Genome Res* 2017, 27(5):677-685.
- 515 32. Yang H, Robinson PN, Wang K. Phenolyzer: phenotype-based prioritization of candidate genes  
516 for human diseases. *Nat Methods* 2015, 12(9):841-843.
- 517 33. NextSV: <http://github.com/Nextomics/NextSV> .

519

520 **Tables**

521 **Table 1. Description of PacBio data sets used for this study.**

| Data Source | Genome    | Original Coverage | Down-sampled Coverage | Mean Read Length | Reference |
|-------------|-----------|-------------------|-----------------------|------------------|-----------|
| NCBI SRA    | NA12878   | 22X               | 2-15X                 | 4.9 kb           | [26]      |
| NCBI SRA    | HX1       | 103X              | 6-15X                 | 7.0 kb           | [20]      |
| NIST        | AJ son    | 69X               | 10X                   | 8.0 kb           | [19]      |
| NIST        | AJ father | 32X               | 10X                   | 7.3 kb           | [19]      |
| NIST        | AJ mother | 30X               | 10X                   | 7.8 kb           | [19]      |

522

523

524 **Table 2. Number of calls in the high-confidence SV sets**

| Genome  | Platform | Number of Deletions     | Number of Insertions    | Reference |
|---------|----------|-------------------------|-------------------------|-----------|
|         |          | ( $\geq 200\text{bp}$ ) | ( $\geq 200\text{bp}$ ) |           |
| NA12878 | Illumina | 2094                    | 1114                    | [17, 18]  |
| HX1     | PacBio   | 2387                    | 2937                    | [20]      |

525

526

527 **Table 3. Time consumption for each steps in the NextSV pipeline for 10X PacBio data set**

| SV caller | Aligner | CPU (number of threads) | Alignment time (hour) | SV calling time (hour) | Total Time (hour) |
|-----------|---------|-------------------------|-----------------------|------------------------|-------------------|
| PBHoney   | BLASR   | 12                      | 79.6                  | 0.27 (Tails)           | 80.8              |
|           |         |                         |                       | 0.96 (Spots)           |                   |
| Sniffles  | BWA-MEM | 12                      | 27.0                  | 1.1                    | 28.1              |
| Sniffles  | NGMLR   | 12                      | 11.2                  | 1.3                    | 12.5              |

528

529 **Figures**

530 Figure 1. Scheme of NextSV workflow.

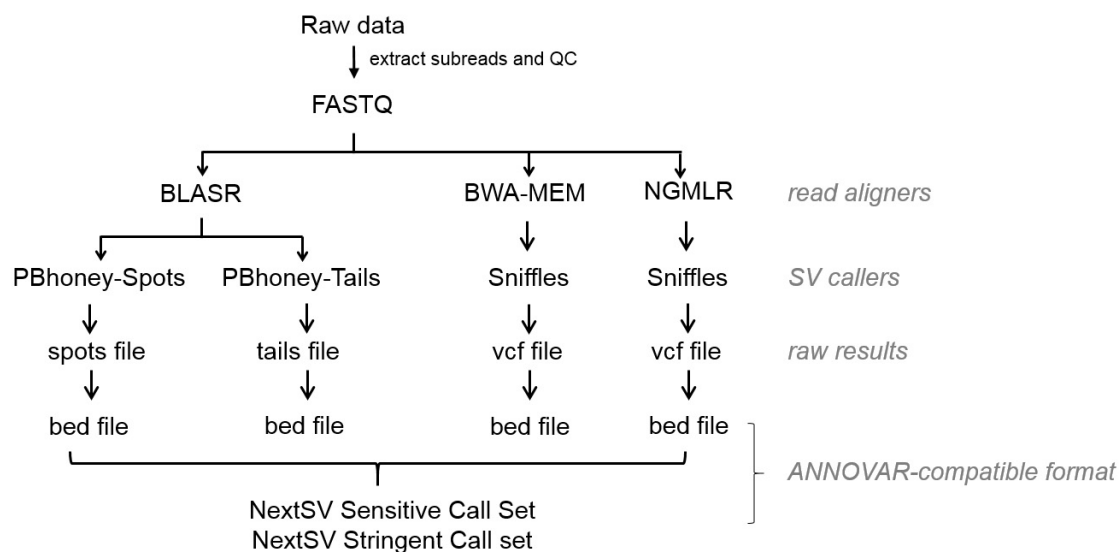

531

532

533

534 Figure 2. Evaluation of recall rates under different coverages on the NA12878 genome. Five down-  
 535 sampling replicates were performed at each coverage. (A) Recall rates of deletion calls. (B) Recall  
 536 rates of insertion calls. Data shown represent mean  $\pm$  SD.

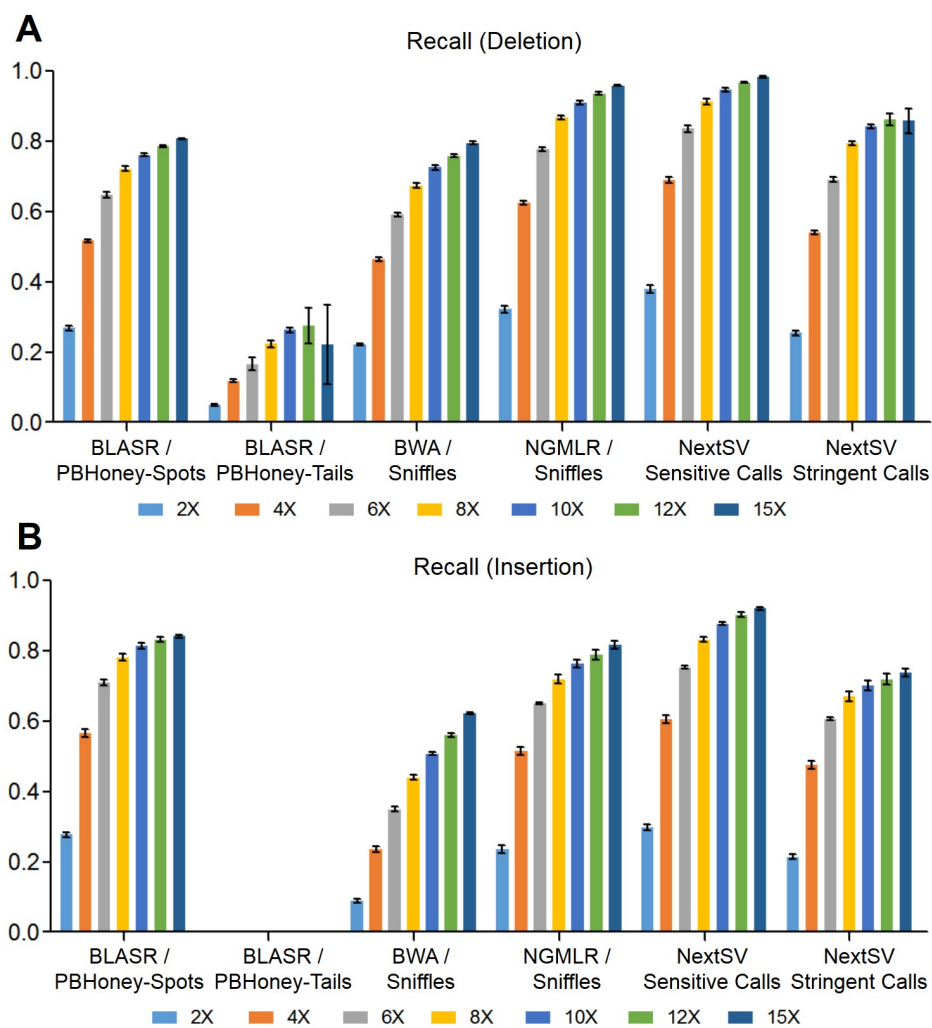

537

538

539 Figure 3. Evaluation of precisions and F1 scores under different coverages on the NA12878  
 540 genome. Five down-sampling replicates were performed. (A) Precisions of deletion calls. (B) F1  
 541 scores of deletion calls. (C) Precisions of insertion calls. (D) F1 scores of insertion calls. Data  
 542 shown represent mean  $\pm$  SD.

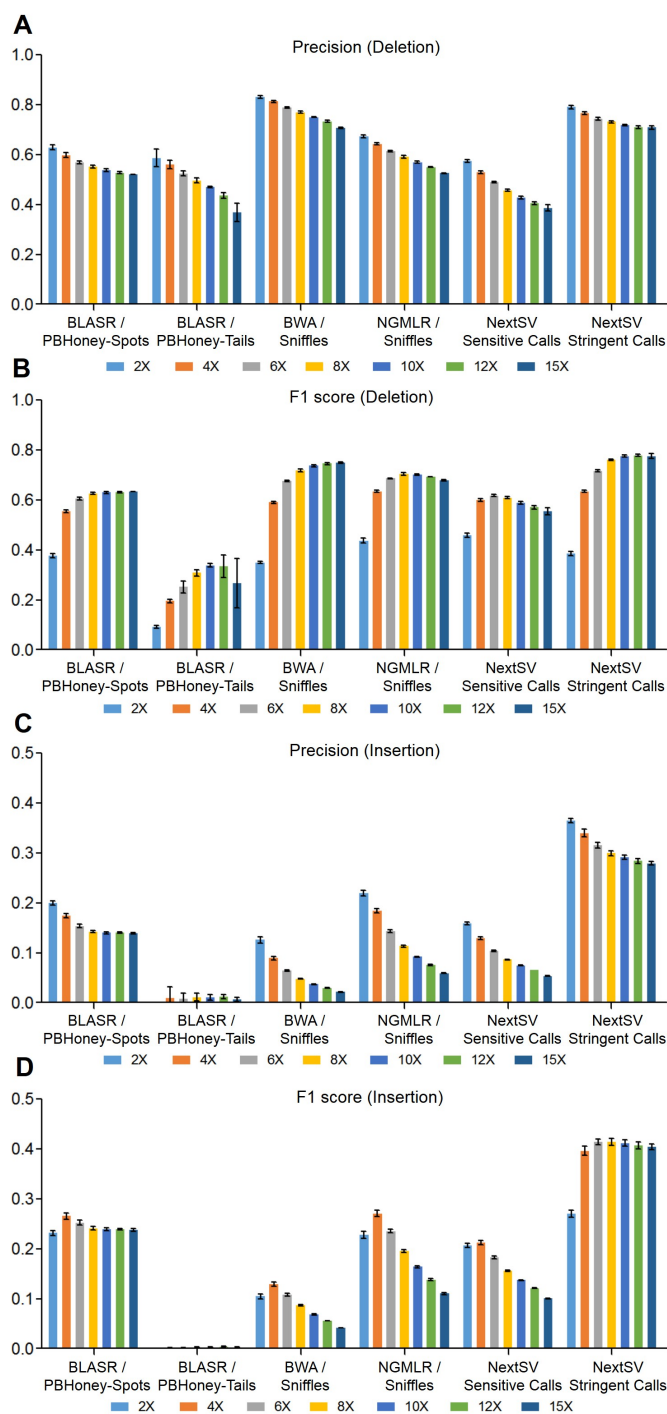

543

544



545 Figure 4. SV calling performance on the HX1 genome. Five down-sampling replicates were  
 546 performed. (A-C) Recall rates, precisions and F1 scores of deletion calls. (D-F) Recall rates,  
 547 recall rates, precisions and F1 scores of insertion calls. Data shown represent mean  $\pm$  SD.

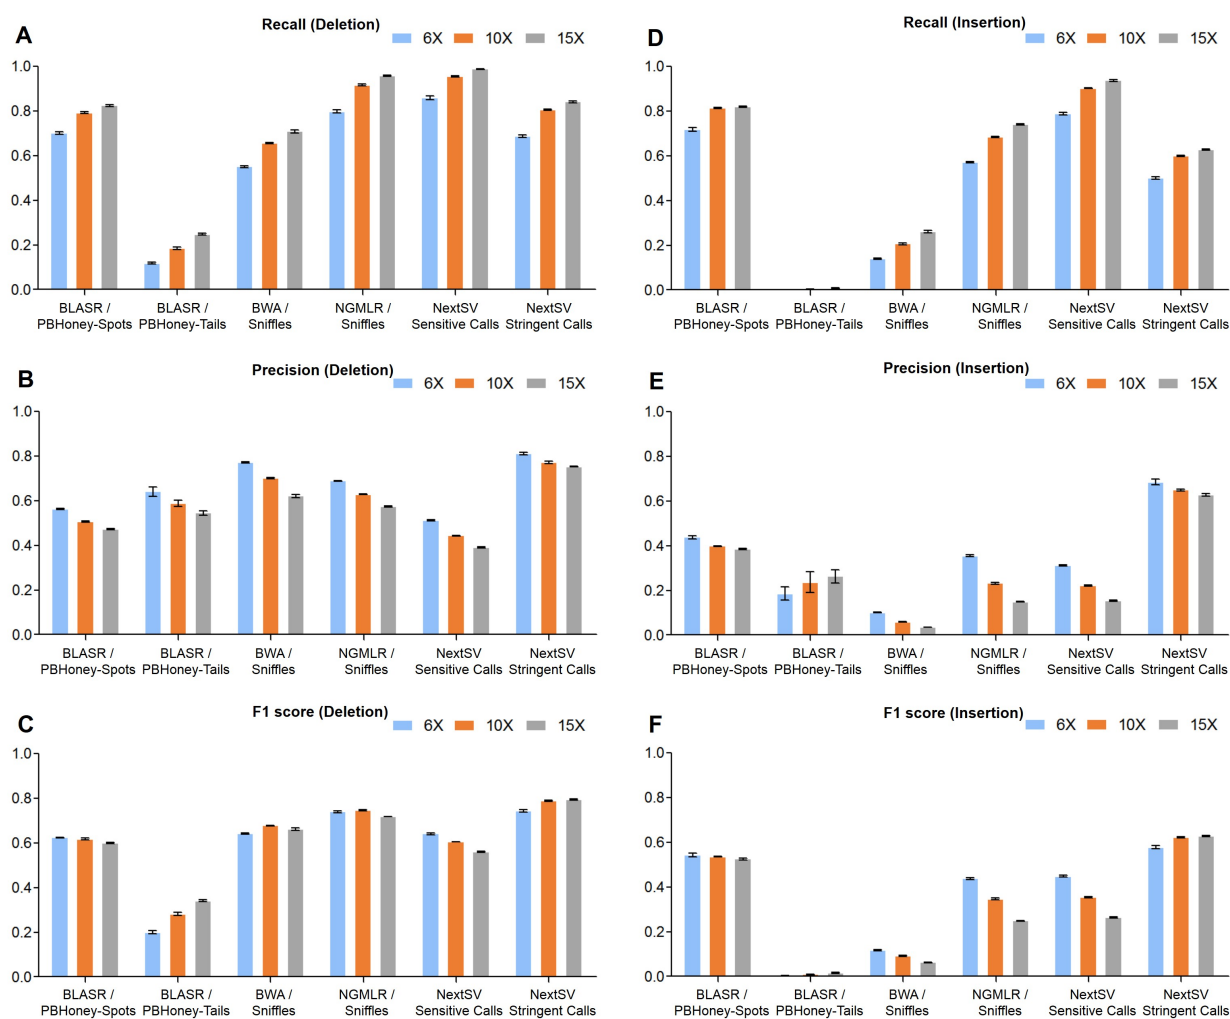

548

549

550 Figure 5. Comparison of allele drop-in rate. For evaluation of ADI rate at 10X coverage, five  
551 down-sampling replicates were performed. (A) ADI rates of deletion call. (B) ADI rate of insertion  
552 calls. Data shown represent mean  $\pm$  SD.

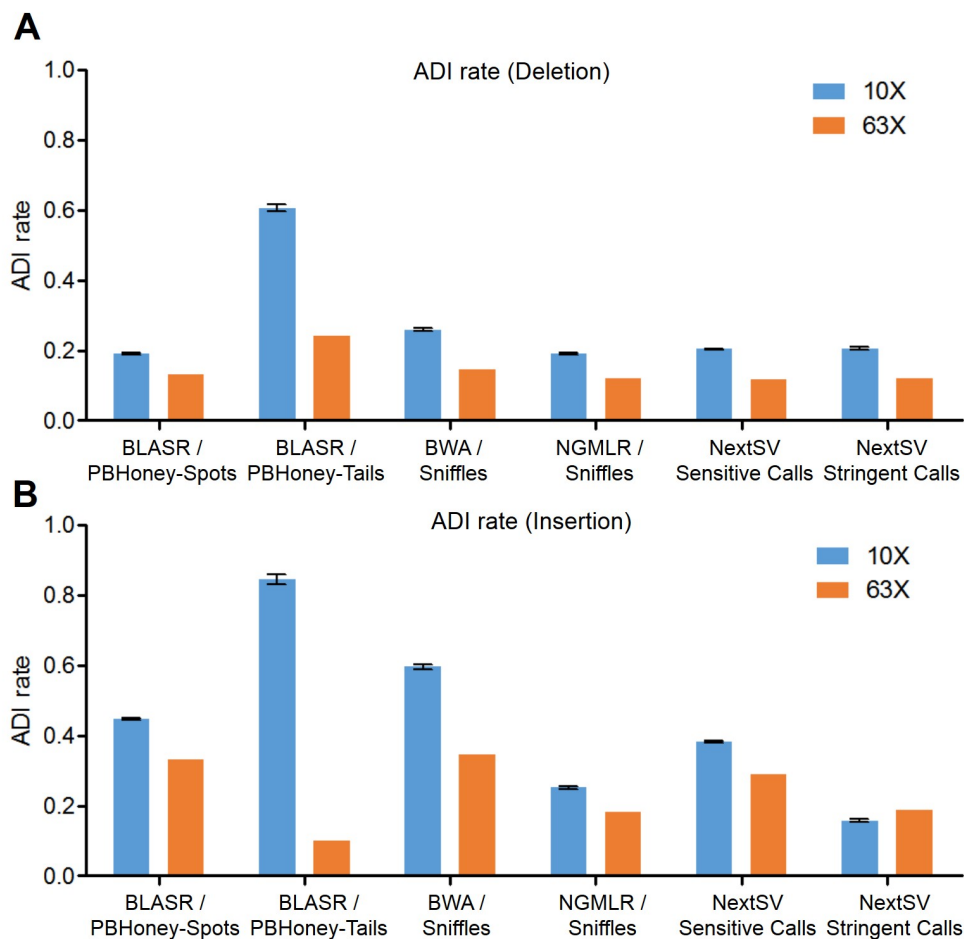

553

554

### 555 **Supplemental file**

556 Supplemental file 1: Tables S1-S24. Performances of BLASR/PBHoney-Spots,

557 BLASR/PBHoney-Tails, BWA/Sniffles, NGMLR/Sniffles and NextSV on the NA12878 genome

558 and the HX1 genome. (PDF 473 kb)

559
